# Supplementary material
Source: PubMed Central journal article supplement (PMC5494526)
Supplement: EMBR-18-1065-s001.pdf [file EMBR-18-1065-s001.pdf]

## Expanded View Figures

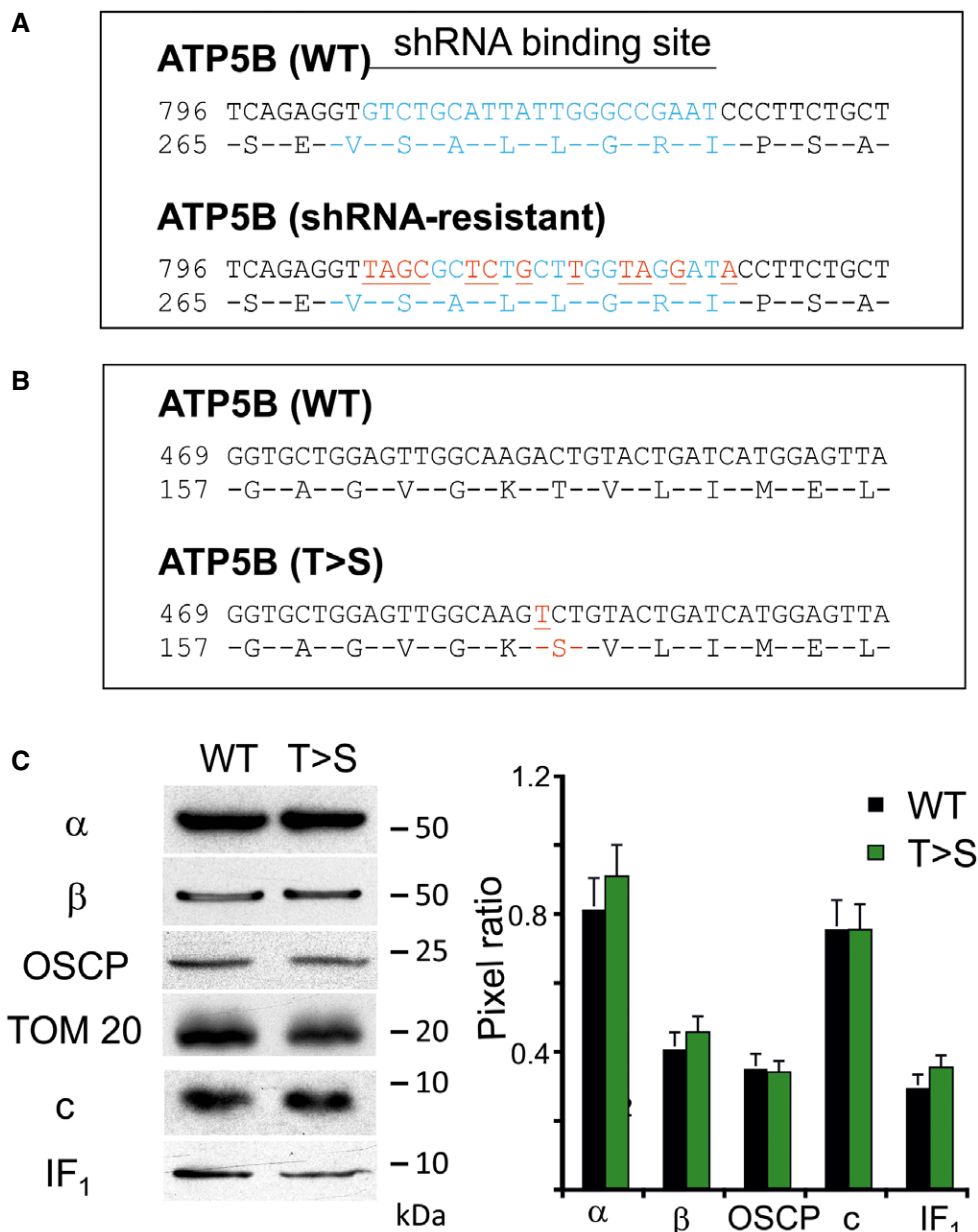

**Figure EV1. Strategy followed in transient co-transfection of HeLa cells: silencing of endogenous  $\beta$  subunit of F-ATP synthase and rescue with wild-type or T163S mutated sequences.**

- A HeLa cells were transfected with shRNA directed to the nucleotide sequence represented in light blue of endogenous  $\beta$  subunit of F-ATP synthase (ATP5B WT). To rescue  $\beta$  subunit expression, HeLa cells were simultaneously transfected with shRNA and with ATP5B harboring silent mutations (red) in the shRNA targeted region (ATP5B shRNA-resistant) in order to avoid its degradation. The corresponding amino acid sequence (ATP5B shRNA-resistant) is identical to that of the wild-type (WT) nucleotide sequence (ATP5B WT).
- B Two different species of shRNA-resistant  $\beta$  sequences were used to rescue  $\beta$  subunit in HeLa cells: shRNA-resistant ATP5B (WT) which generates an amino acid sequence that does not differ from that of the endogenous  $\beta$  subunit and shRNA-resistant ATP5B (T>S) that generates a  $\beta$  subunit with a point mutation (in red) that causes the T163S substitution.
- C The effect of silencing and reexpression of WT or T>S mutant ATP5B on expression of F-ATP synthase subunits and of its inhibitory protein IF<sub>1</sub> was assessed by Western blotting. TOM20 was included as a loading control. Molecular size is indicated on the right. The bar graph shows the ratio ( $\pm$  s.e., three independent experiments) between the quantified bands corresponding to F-ATP synthase subunits and TOM20 in WT or T>S mutants.

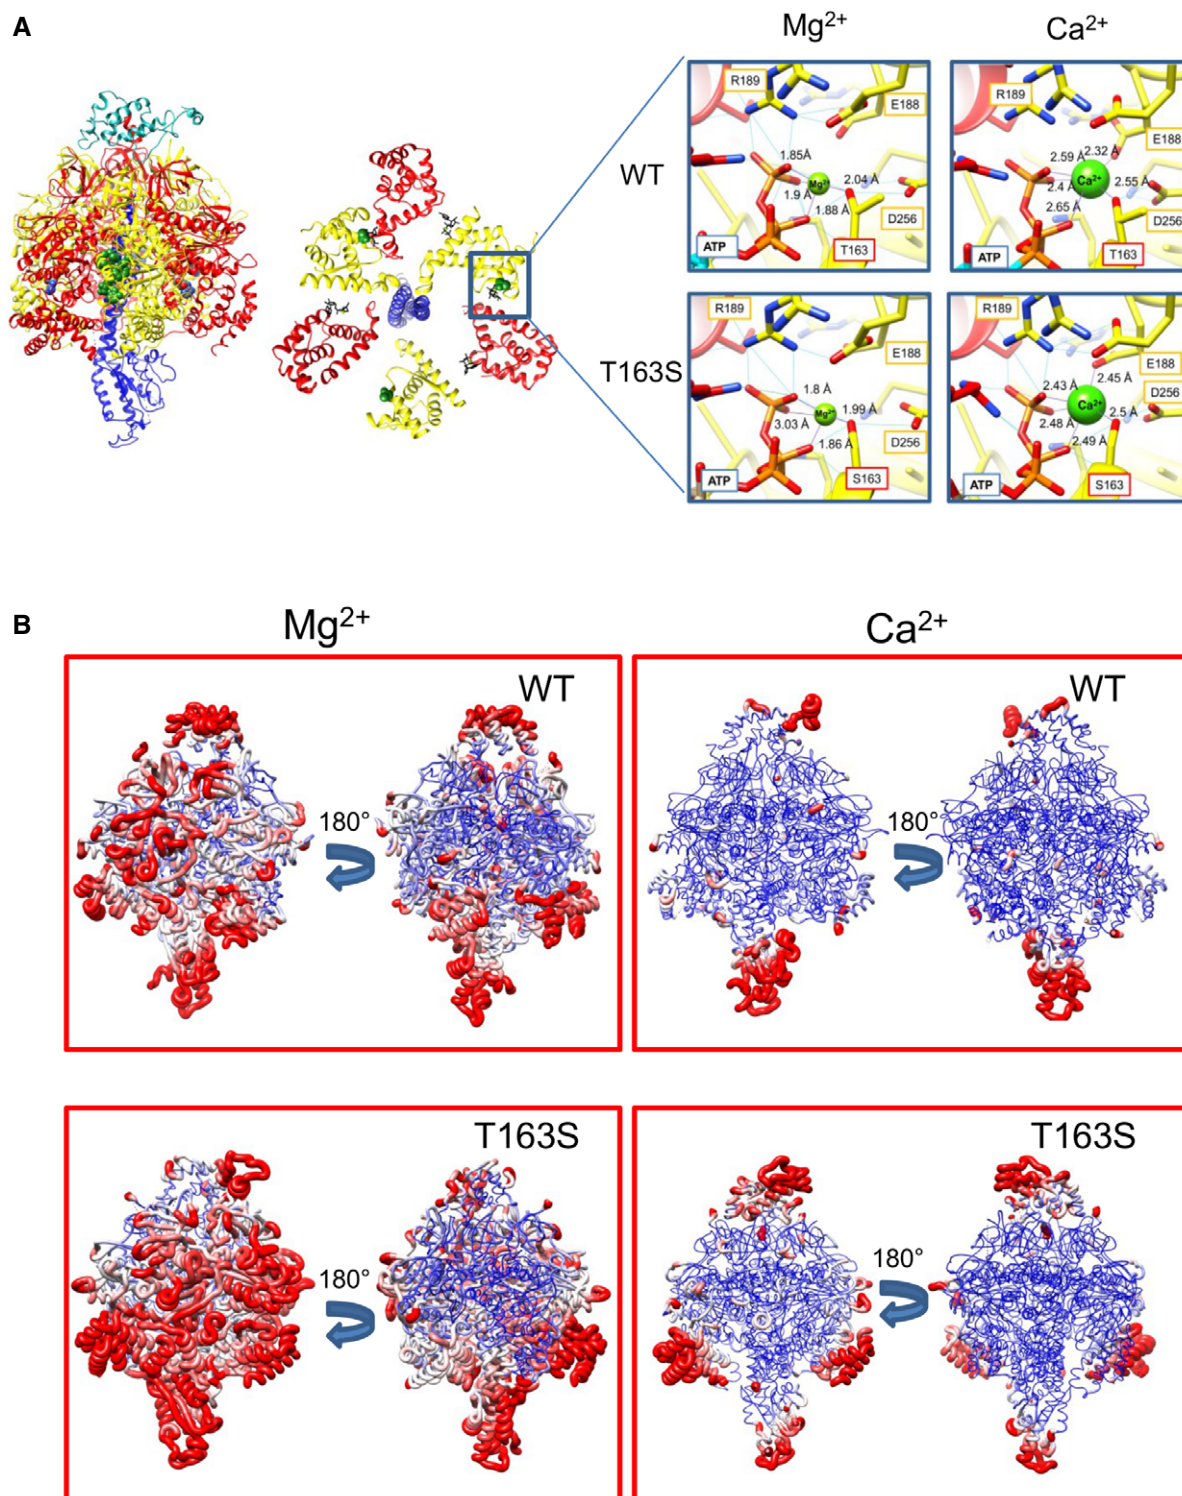

**Figure EV2. Molecular dynamics simulation of wild-type and T163S  $\beta$  mutant F-ATP synthase with  $Mg^{2+}$  and  $Ca^{2+}$  bound to the catalytic site.**

**A** Lateral and top view of F1; location of  $\beta$  T163 is marked by green spheres. Red,  $\alpha$  subunits; yellow,  $\beta$  subunits; blue,  $\gamma$  subunit; turquoise, OSCP (lateral view only). The enlargement shows  $Mg^{2+}$  and  $Ca^{2+}$  bound to the  $Me^{2+}$  sites and their coordination distances. Hydrogen bonds and ion contacts are shown in blue and purple, respectively, with the distance between ion and coordinating atoms in Å.

**B** F1-OSCP backbone with coloring and thickness representing RMSF. Blue and red denote residues with  $RMSF \leq 4$  Å and  $\geq 5.5$  Å, respectively. The same RMSF range is used to draw backbone thickness. Rotation is along the y-axis.

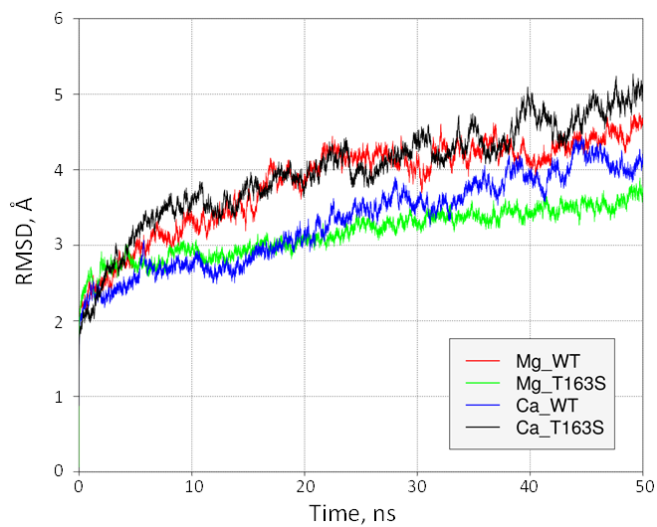

**Figure EV3. Root mean square deviation of coordinates for non-hydrogen atoms as a function of simulation time.**

Calculation was performed during 50 ns of molecular dynamics simulation. The x-axis represents the simulation time (ns) and the y-axis the backbone movement (Å).

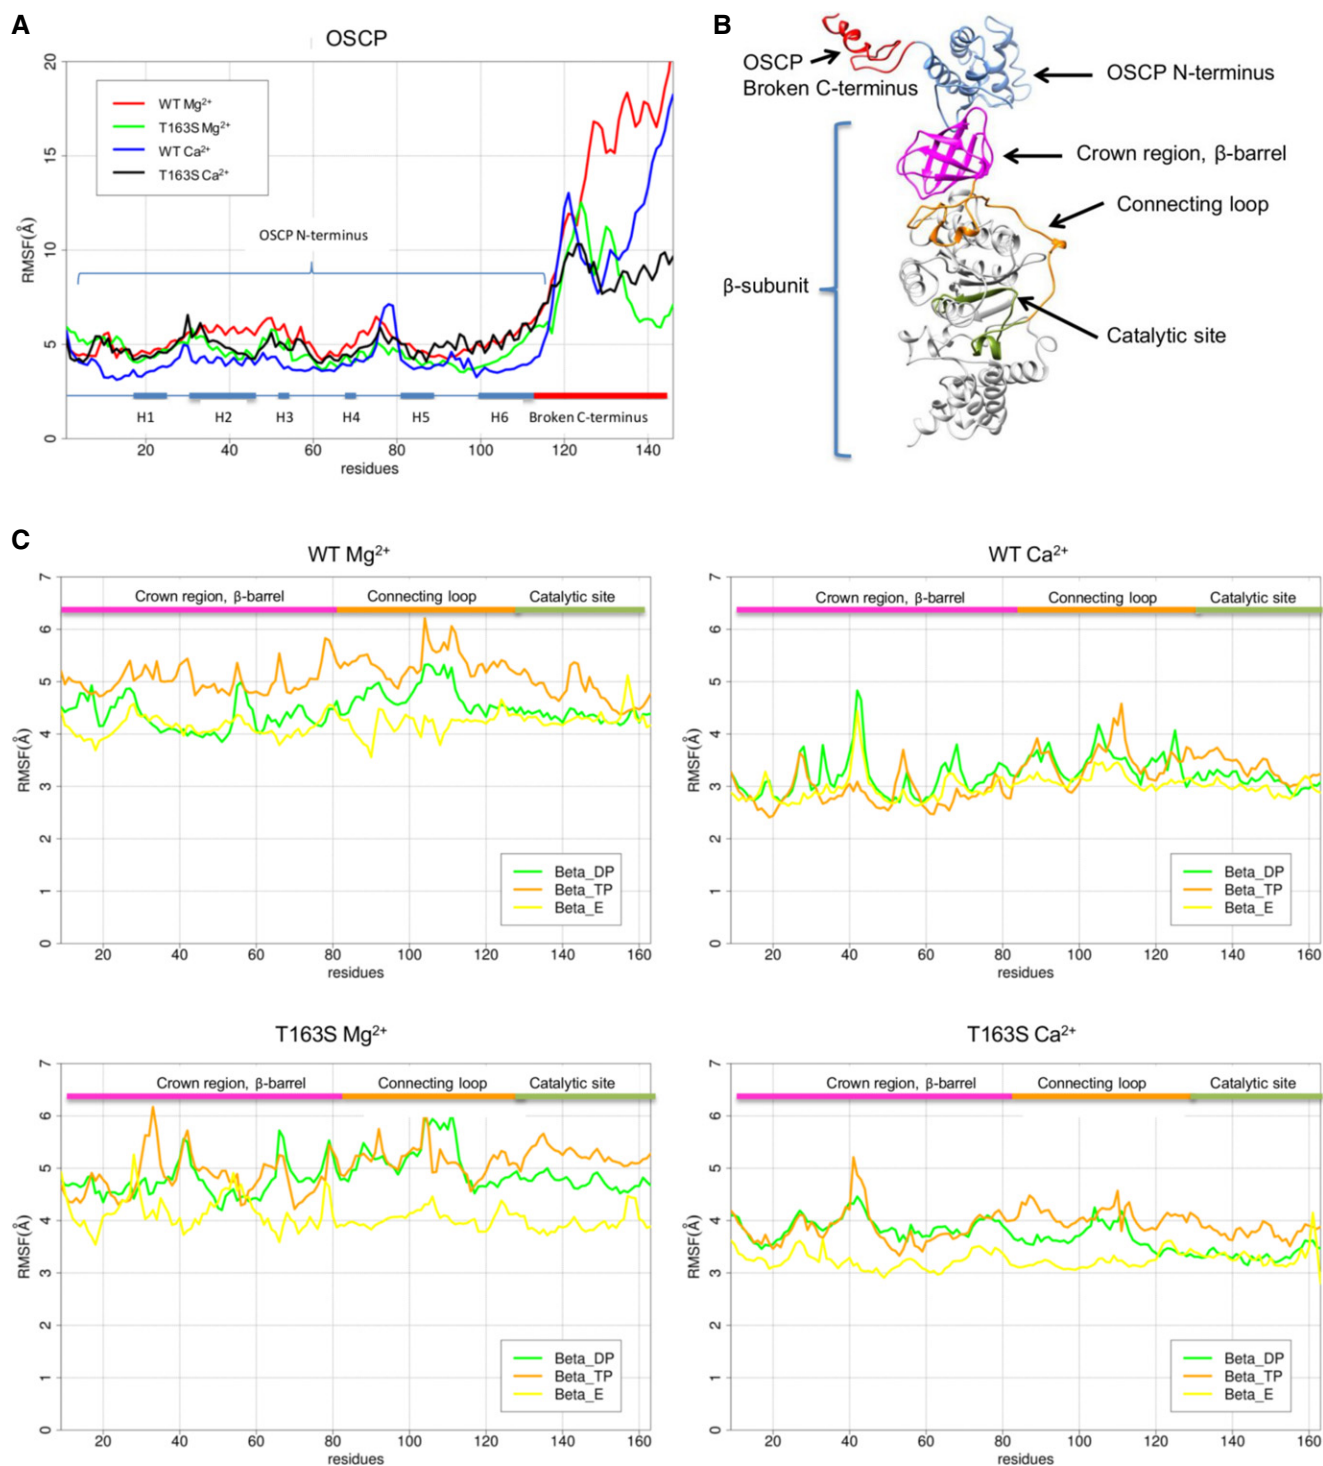

**Figure EV4.** Root mean square fluctuations of OSCP 1–146 and  $\beta$  subunit region 9–163.

A The plot shows the RMSF values of OSCP interacting with wild-type (WT) and T>S mutant  $\beta$  subunits binding Mg<sup>2+</sup> and Ca<sup>2+</sup>. Rectangles below the graphs indicate the position of the  $\alpha$  helices (H) of OSCP and the C-terminal region.

B Structure of subunit  $\beta$  and OSCP.

C The plots show the RMSF values of wild-type (WT) and T>S mutant of subunit  $\beta$  region 9–163 binding Mg<sup>2+</sup> and Ca<sup>2+</sup>.
